# Supplementary material for: Endophyte Inoculation and Elevated Potassium Supply on Productivity, Growth and Physiological Parameters of Spring Barley (Hordeum vulgare L.) Genotypes over Contrasting Seasons
Source: MDPI journal article supplement (doi:10.3390/plants13081168), 2024-04-22
Supplement: s1 [file s1]

# Endophyte Inoculation and Elevated Potassium Supply on Productivity, Growth and Physiological Parameters of Spring Barley (*Hordeum vulgare* L.) Genotypes Over Contrasting Seasons

Dominik Bleša, Pavel Matušinský, Milan Baláž, Zdeněk Nesvadba and Marta Zavřelová

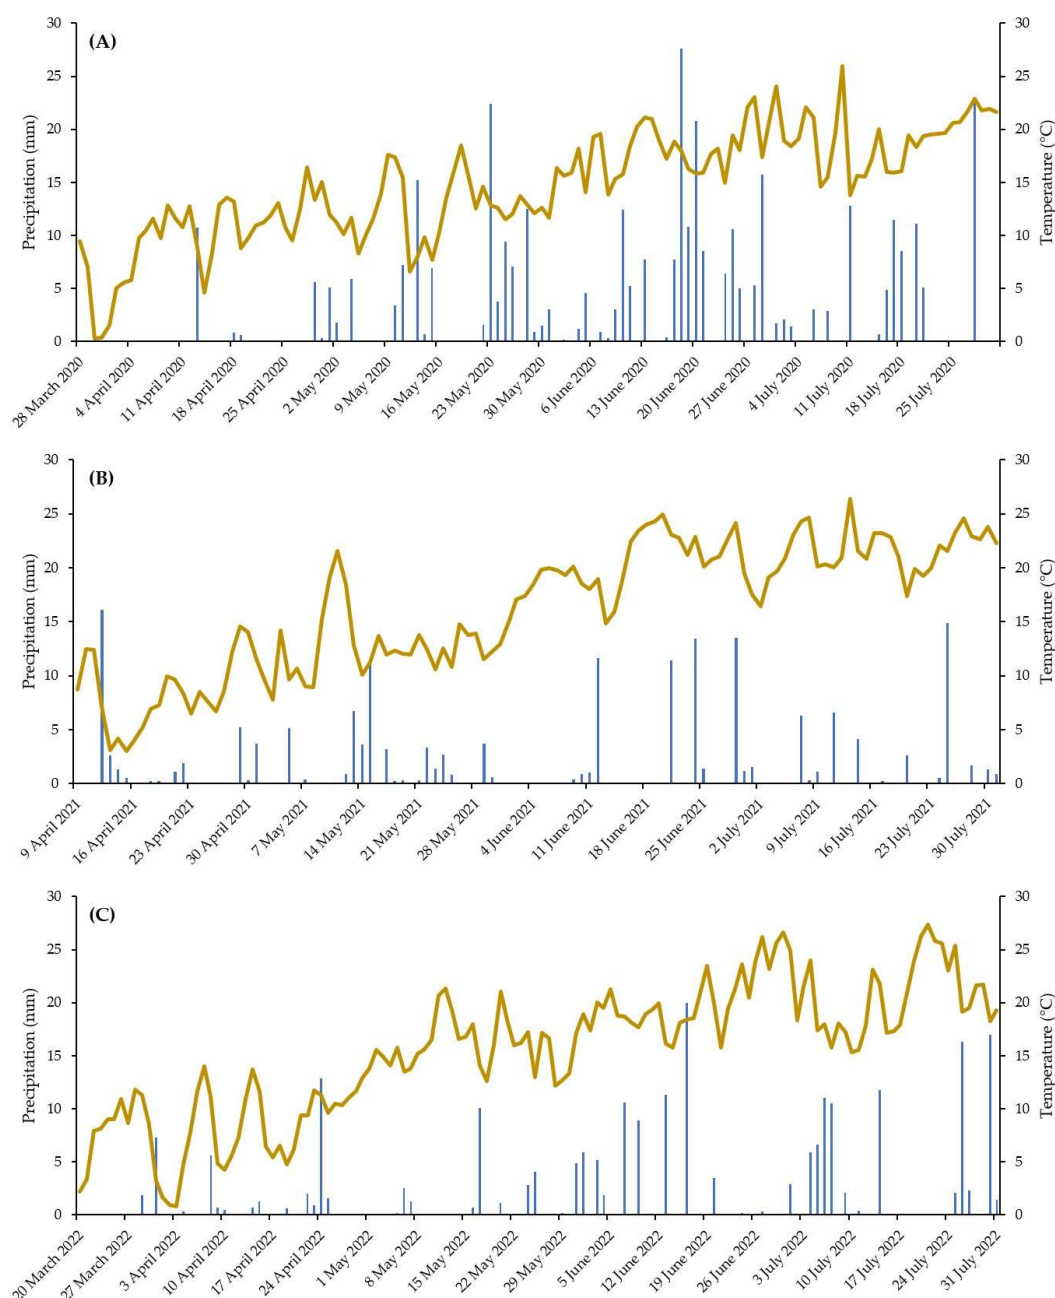

**Figure S1.** Mean temperatures and precipitation in growing seasons (A) 2020; (B) 2021; (C) 2022.

**Table S1.** The nutrient content in the soil taken at the experimental site before experiments.

| Season | P (mg·kg <sup>-1</sup> ) | K (mg·kg <sup>-1</sup> ) | Ca (mg·kg <sup>-1</sup> ) | Mg (mg·kg <sup>-1</sup> ) | pH/KCl |
|--------|--------------------------|--------------------------|---------------------------|---------------------------|--------|
| 2020   | 70                       | 208                      | 2553                      | 285                       | 5.04   |
| 2021   | 46                       | 137                      | 2355                      | 253                       | 5.27   |
| 2022   | 120                      | 170                      | 2890                      | 153                       | 6.44   |

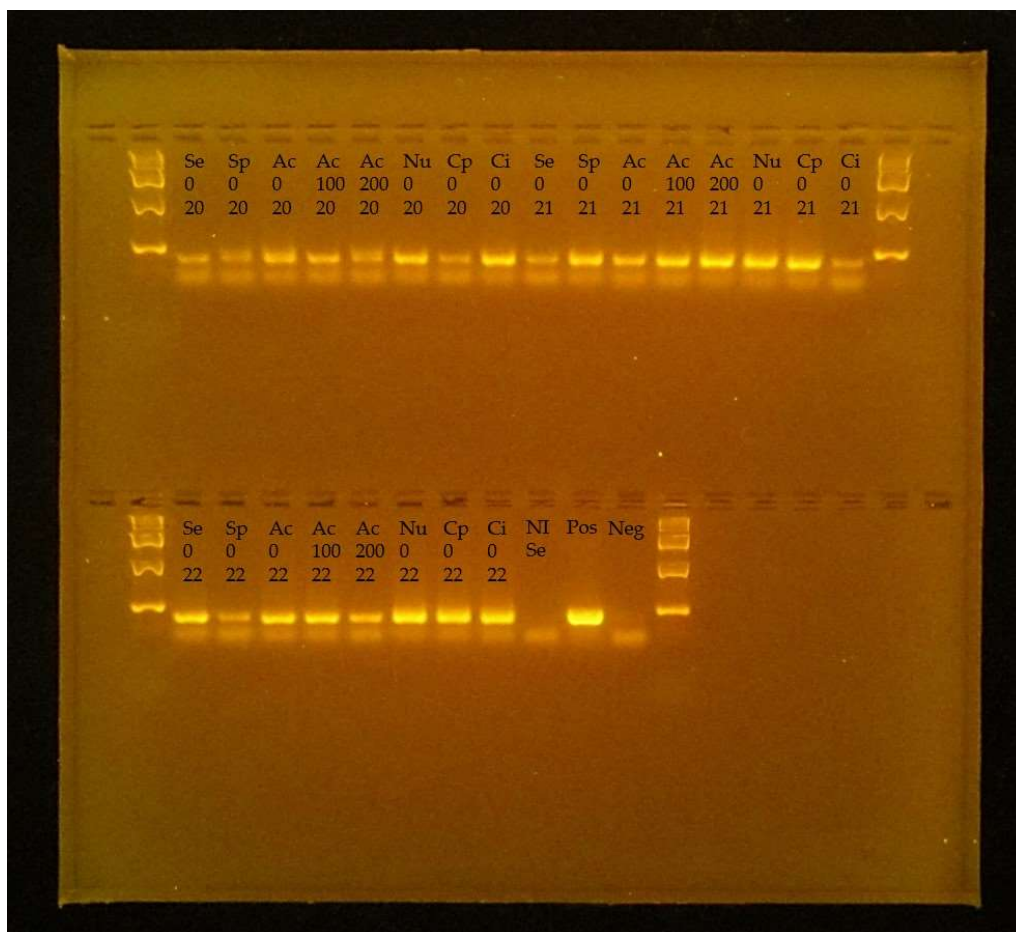**Figure S2.** Electrophoresis gel of the PCR products using *Serendipita indica*-specific primers. Samples were isolated from barley roots in seasons 2020–2022. Se – Sebastian, Sp – Spitfire, Ac – Accordine, Nu – Nutans Afganistan, Cp – CPI 18197, Ci – CI 6388 genotypes; 0, 100, 200 – kg/ha potassium supply; 20 – season 2020, 21 – season 2021, 22 – season 2022; NI – not inoculated; Pos – positive control using fungal DNA, Neg – negative control.

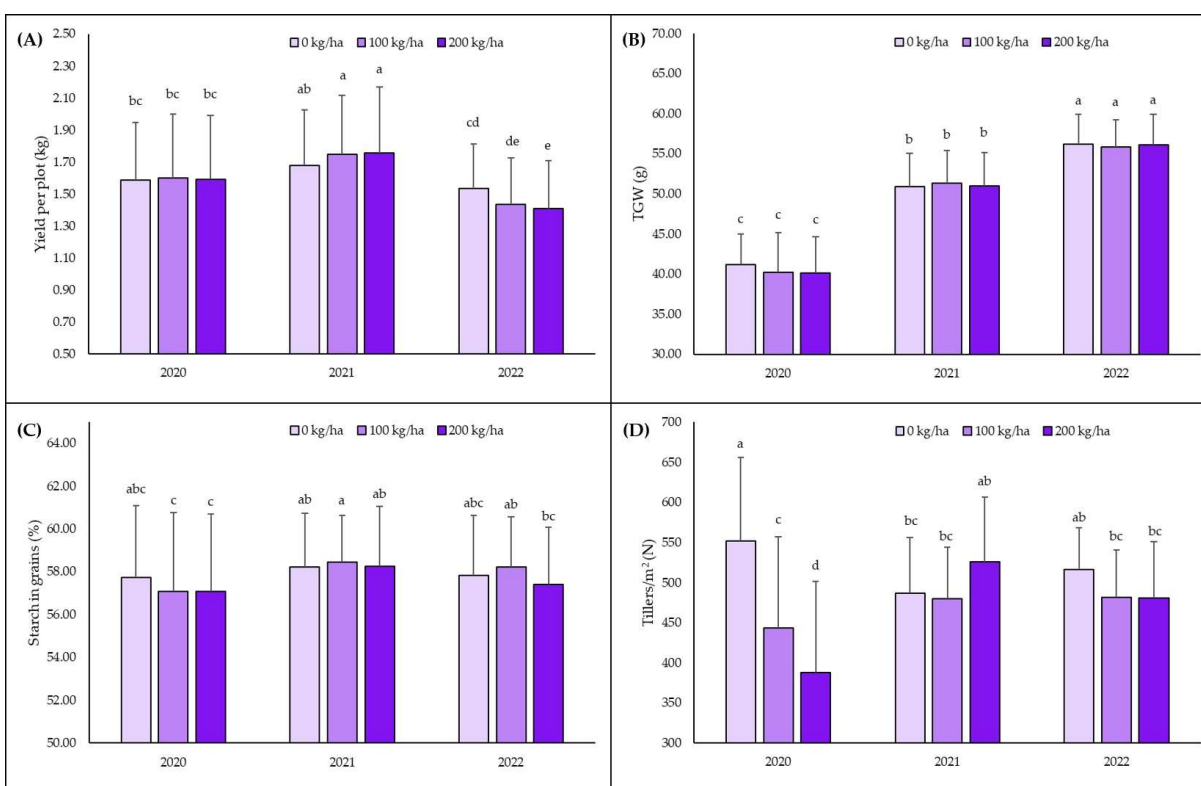

**Figure S3.** Interaction of fertilization and season on productive parameters and tillering. (A) yield per plot; (B) thousand grains weight; (C) starch in grains; (D) tillers. Columns represent means, bars SD ( $n = 30$ ) followed by the same letter if there was no statistical difference according to Tukey<sub>0.05</sub> test.

**Table S2.** Interaction of fertilization, inoculation and season factors on the thousand grains weight and plant height. Treatment is in format fertilization (0, 100, or 200 kg of potassium per ha) × inoculation (NI – not inoculated, *S. indica* – *Serendipita indica*) × season (2020–2022). Data represent means ± SD ( $n = 12$  for *S. indica*;  $n = 18$  for NI) followed by the same letter if there was no statistical difference according to Tukey<sub>0.05</sub> test for unequal sample sizes.

| Treatment                   | TGW (g)         | Plant height (cm) |
|-----------------------------|-----------------|-------------------|
| 0×NI×2020                   | 40.56 ± 3.82 cd | 84.8 ± 6.5 a      |
| 0×NI×2021                   | 50.91 ± 3.85 b  | 75.3 ± 7.5 cd     |
| 0×NI×2022                   | 56.14 ± 3.80 a  | 68.1 ± 6.6 f      |
| 0× <i>S. indica</i> ×2020   | 41.98 ± 3.86 c  | 82.0 ± 8.8 ab     |
| 0× <i>S. indica</i> ×2021   | 50.80 ± 4.77 b  | 75.3 ± 8.4 cde    |
| 0× <i>S. indica</i> ×2022   | 56.32 ± 3.69 a  | 70.5 ± 6.8 cdef   |
| 100×NI×2020                 | 40.22 ± 4.96 cd | 84.9 ± 9.8 a      |
| 100×NI×2021                 | 51.24 ± 4.44 b  | 76.2 ± 6.6 bcd    |
| 100×NI×2022                 | 55.88 ± 3.37 a  | 71.0 ± 8.5 cdef   |
| 100× <i>S. indica</i> ×2020 | 40.13 ± 5.14 cd | 88.4 ± 7.5 a      |
| 100× <i>S. indica</i> ×2021 | 51.34 ± 3.80 b  | 75.5 ± 7.0 bcd    |
| 100× <i>S. indica</i> ×2022 | 55.88 ± 3.51 a  | 68.5 ± 7.9 f      |
| 200×NI×2020                 | 40.69 ± 4.97 cd | 86.3 ± 7.2 a      |
| 200×NI×2021                 | 50.73 ± 4.09 b  | 76.4 ± 5.7 bc     |
| 200×NI×2022                 | 55.98 ± 4.00 a  | 68.6 ± 8.4 f      |
| 200× <i>S. indica</i> ×2020 | 39.27 ± 3.81 d  | 88.0 ± 8.3 a      |

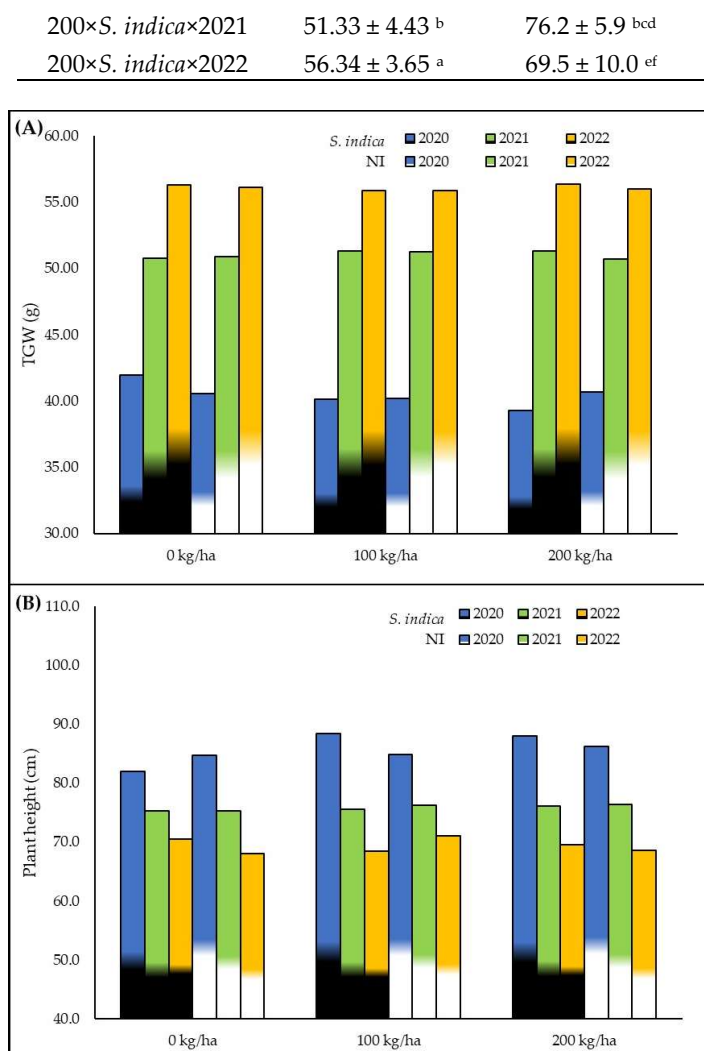

**Figure S4.** Interaction of fertilization, inoculation, and season factors on the (A) thousand grains weight (TGW) and (B) plant height. Fertilization doses 0, 100, or 200 kg of potassium per ha, season (2020–2022); and inoculation (NI – not inoculated, *S. indica* – *Serendipita indica*). Data represent means ( $n = 12$  for *S. indica*;  $n = 18$  for NI). Statistical significance and *SD* values are shown in the Supplementary Table 2.

**Table S3.** Interaction of genotype, fertilization and season factors on the tillering, plant height and carbon isotope signature ( $\delta^{13}\text{C}$ ). Treatment is in format genotype  $\times$  fertilization (0, 100, or 200 kg of potassium per ha)  $\times$  season (2020–2022). Data represent means  $\pm$  *SD* ( $n = 5$ ) followed by the same letter if there was no statistical difference according to Tukey<sub>0.05</sub> test.

| Treatment                            | Tillers/m <sup>2</sup> (N) | Plant height (cm)            | $\delta^{13}\text{C}$ (‰) |
|--------------------------------------|----------------------------|------------------------------|---------------------------|
| Sebastian $\times$ 0 $\times$ 2020   | 608 $\pm$ 74 ab            | 75.4 $\pm$ 2.1 defghijklmnop | -29.8 $\pm$ 0.3 lmnopqrs  |
| Sebastian $\times$ 0 $\times$ 2021   | 610 $\pm$ 21 ab            | 61.6 $\pm$ 2.9 stuv          | -29.1 $\pm$ 0.1 ghijklmno |
| Sebastian $\times$ 0 $\times$ 2022   | 535 $\pm$ 75 abcdefgh      | 60.8 $\pm$ 1.9 tuv           | -27.6 $\pm$ 0.2 de        |
| Sebastian $\times$ 100 $\times$ 2020 | 602 $\pm$ 56 abc           | 80.6 $\pm$ 3.8 bcdefghijkl   | -30.2 $\pm$ 0.5 s         |
| Sebastian $\times$ 100 $\times$ 2021 | 573 $\pm$ 27 abcd          | 63.8 $\pm$ 3.0 rstuv         | -29.1 $\pm$ 0.4 ghijklmno |
| Sebastian $\times$ 100 $\times$ 2022 | 558 $\pm$ 80 abcdef        | 58.0 $\pm$ 3.5 v             | -27.8 $\pm$ 0.2 ef        |
| Sebastian $\times$ 200 $\times$ 2020 | 486 $\pm$ 120 bcdefghijk   | 78.6 $\pm$ 1.3 bcdefghijklm  | -30.3 $\pm$ 0.5 s         |
| Sebastian $\times$ 200 $\times$ 2021 | 642 $\pm$ 14 a             | 65.8 $\pm$ 0.8 opqrstuv      | -28.9 $\pm$ 0.0 ghijkl    |

|                            |                       |                          |                          |
|----------------------------|-----------------------|--------------------------|--------------------------|
| Sebastian×200×2022         | 568 ± 41 abcd         | 58.6 ± 2.6 uv            | -27.7 ± 0.2 de           |
| Spitfire×0×2020            | 568 ± 144 abcd        | 85.6 ± 6.4 abcdef        | -30.0 ± 0.4 qrs          |
| Spitfire×0×2021            | 480 ± 33 bcdefghijkl  | 72.0 ± 2.1 ijklmnopqr    | -29.2 ± 0.2 ghijklmnop   |
| Spitfire×0×2022            | 530 ± 24 abcdefgh     | 65.0 ± 3.2 pqrstuv       | -27.3 ± 0.3 cde          |
| Spitfire×100×2020          | 430 ± 91 defghijklm   | 82.4 ± 3.4 bcdefghij     | -30.1 ± 0.3 rs           |
| Spitfire×100×2021          | 529 ± 42 abcdefgh     | 74.4 ± 2.3 efghijklmnopq | -29.0 ± 0.2 ghijklmn     |
| Spitfire×100×2022          | 473 ± 33 bcdefghijklm | 67.0 ± 5.4 nopqrstuv     | -27.2 ± 0.4 cde          |
| Spitfire×200×2020          | 393 ± 57 ghijklm      | 86.0 ± 3.9 abcde         | -30.1 ± 0.3 rs           |
| Spitfire×200×2021          | 533 ± 28 abcdefgh     | 80.0 ± 2.0 bcdefghijkl   | -29.0 ± 0.2 ghijklmn     |
| Spitfire×200×2022          | 473 ± 63 bcdefghijklm | 64.8 ± 3.6 qrstuv        | -27.4 ± 0.4 cde          |
| Accordine×0×2020           | 538 ± 116 abcdefgh    | 86.2 ± 3.0 abcde         | -29.8 ± 0.3 nopqrs       |
| Accordine×0×2021           | 508 ± 21 abcdefghi    | 81.4 ± 2.2 bcdefghijk    | -28.5 ± 0.3 fg           |
| Accordine×0×2022           | 496 ± 43 abcdefghi    | 67.2 ± 3.1 nopqrstuv     | -27.4 ± 0.3 cde          |
| Accordine×100×2020         | 542 ± 37 abcdefg      | 88.0 ± 6.3 abc           | -29.8 ± 0.3 mnopqrs      |
| Accordine×100×2021         | 494 ± 17 abcdefghij   | 81.0 ± 1.0 bcdefghijk    | -28.8 ± 0.4 ghijk        |
| Accordine×100×2022         | 472 ± 28 bcdefghijklm | 67.8 ± 2.3 mnopqrstu     | -26.9 ± 0.2 cd           |
| Accordine×200×2020         | 447 ± 98 cdefghijklm  | 90.0 ± 1.6 ab            | -29.8 ± 0.2 lmnopqrs     |
| Accordine×200×2021         | 572 ± 22 abcd         | 81.4 ± 1.7 bcdefghijk    | -28.9 ± 0.1 ghijk        |
| Accordine×200×2022         | 464 ± 81 bcdefghijklm | 65.8 ± 4.1 opqrstuv      | -27.0 ± 0.3 cde          |
| Nutans Afganistan×0×2020   | 562 ± 69 abcde        | 90.0 ± 6.0 ab            | -29.5 ± 0.3 hijklmnopqrs |
| Nutans Afganistan×0×2021   | 488 ± 21 abcdefghijk  | 83.2 ± 2.0 bcdefghi      | -28.7 ± 0.1 gh           |
| Nutans Afganistan×0×2022   | 500 ± 36 abcdefghi    | 75.6 ± 6.0 defghijklmno  | -26.0 ± 0.4 ab           |
| Nutans Afganistan×100×2020 | 320 ± 46 m            | 91.8 ± 14.1 ab           | -29.6 ± 0.3 klmnopqrs    |
| Nutans Afganistan×100×2021 | 418 ± 23 defghijklm   | 81.2 ± 1.6 bcdefghijk    | -28.7 ± 0.2 ghi          |
| Nutans Afganistan×100×2022 | 442 ± 35 defghijklm   | 83.2 ± 2.8 bcdefghi      | -25.7 ± 0.8 a            |
| Nutans Afganistan×200×2020 | 339 ± 133 jklm        | 98.4 ± 8.5 a             | -29.3 ± 0.4 ghijklmnopqr |
| Nutans Afganistan×200×2021 | 385 ± 15 hijklm       | 74.4 ± 1.5 efghijklmnopq | -28.6 ± 0.3 fg           |
| Nutans Afganistan×200×2022 | 442 ± 55 defghijklm   | 84.2 ± 5.9 bcdefgh       | -26.0 ± 0.5 ab           |
| CPI 18197×0×2020           | 489 ± 82 abcdefghijk  | 77.2 ± 6.7 cdefghijklmn  | -30.1 ± 0.1 s            |
| CPI 18197×0×2021           | 405 ± 18 fghijklm     | 73.6 ± 2.5 fghijklmnopqr | -29.0 ± 0.2 ghijklm      |
| CPI 18197×0×2022           | 532 ± 86 abcdefgh     | 72.4 ± 6.8 ijklmnopqr    | -26.7 ± 0.2 bc           |
| CPI 18197×100×2020         | 412 ± 65 efghijklm    | 86.0 ± 9.8 abcde         | -29.5 ± 0.3 ijklmnopqrs  |
| CPI 18197×100×2021         | 422 ± 39 defghijklm   | 73.6 ± 1.5 fghijklmnopqr | -29.3 ± 0.2 ghijklmnopqr |
| CPI 18197×100×2022         | 447 ± 52 cdefghijklm  | 72.6 ± 1.5 hijklmnopqr   | -26.6 ± 0.5 bc           |
| CPI 18197×200×2020         | 337 ± 72 klm          | 83.6 ± 5.0 bcdefghi      | -29.6 ± 0.3 jklmnopqrs   |
| CPI 18197×200×2021         | 514 ± 30 abcdefgh     | 75.4 ± 1.7 defghijklmnop | -29.2 ± 0.2 ghijklmnopq  |
| CPI 18197×200×2022         | 442 ± 53 defghijklm   | 70.6 ± 3.6 klmnopqrst    | -26.7 ± 0.2 bc           |
| CI 6388×0×2020             | 548 ± 136 abcdefg     | 87.6 ± 7.2 abcd          | -29.9 ± 0.2 opqrs        |
| CI 6388×0×2021             | 429 ± 18 defghijklm   | 80.0 ± 1.2 bcdefghijkl   | -28.8 ± 0.3 ghijk        |
| CI 6388×0×2022             | 504 ± 27 abcdefghi    | 73.4 ± 3.8 ghijklmnopqr  | -27.0 ± 0.3 cde          |
| CI 6388×100×2020           | 354 ± 33 ijklm        | 89.0 ± 10.7 abc          | -30.0 ± 0.6 qrs          |
| CI 6388×100×2021           | 445 ± 10 defghijklm   | 81.6 ± 1.1 bcdefghijk    | -28.8 ± 0.3 ghij         |
| CI 6388×100×2022           | 499 ± 39 abcdefghi    | 71.4 ± 2.6 jklmnopqrs    | -27.4 ± 0.3 cde          |
| CI 6388×200×2020           | 325 ± 127 lm          | 85.2 ± 4.4 abcdefg       | -30.0 ± 0.4 pqrs         |
| CI 6388×200×2021           | 508 ± 19 abcdefghi    | 81.0 ± 1.9 bcdefghijk    | -28.7 ± 0.3 gh           |
| CI 6388×200×2022           | 496 ± 59 abcdefghi    | 69.8 ± 5.7 lmnopqrst     | -27.3 ± 0.4 cde          |

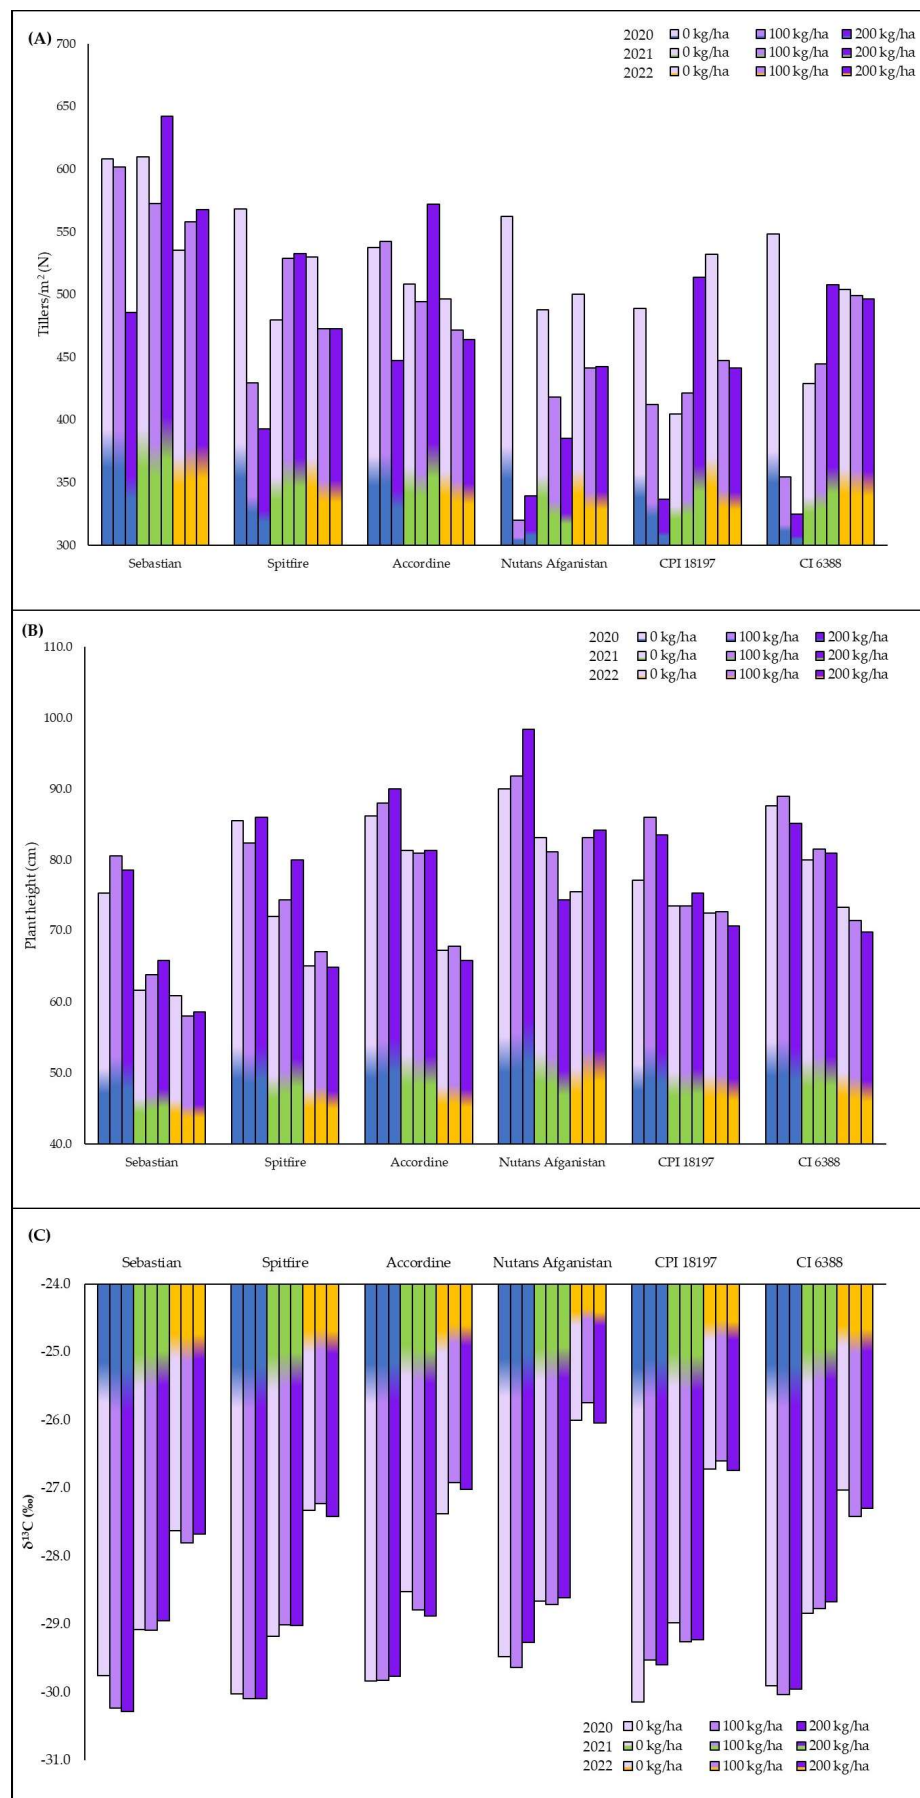

**Figure S5.** Interaction of genotype, fertilization, and season factors on the (A) tillering; (B) plant height; and (C) carbon isotope signature ( $\delta^{13}\text{C}$ ). Fertilization doses 0, 100, or 200 kg of potassium per ha, season (2020–2022). Data represent means ( $n = 5$ ). Statistical significance and SD values are shown in the Supplementary Table 4.

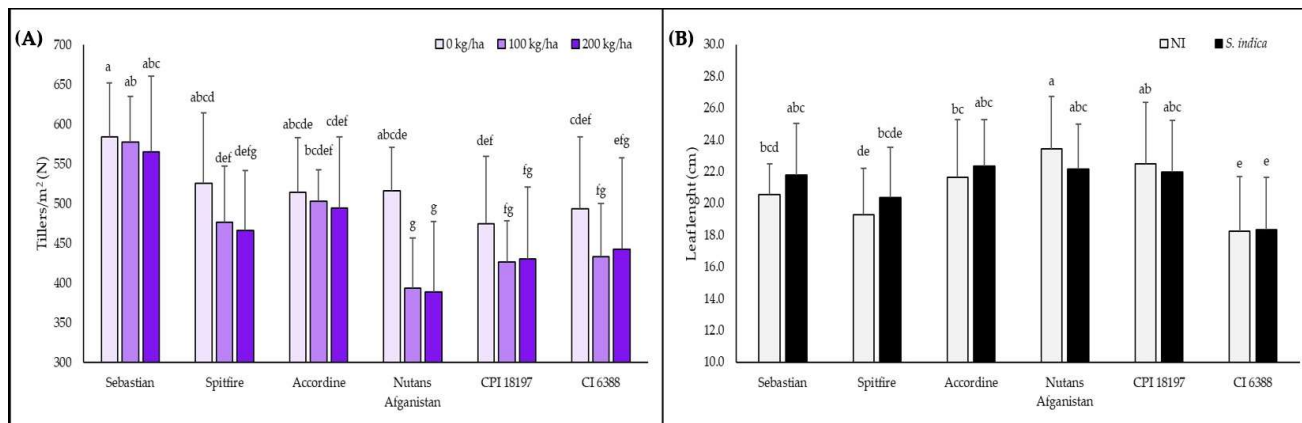

**Figure S6.** (A) Tillering of different genotypes in interaction with fertilization – columns represent means, bars SD ( $n = 15$ ); (B) Leaf length in interaction of genotype and inoculation – columns represent means, bars SD ( $n = 18$  for *S. indica*;  $n = 27$  for NI); followed by the same letter if there was no statistical difference according to Tukey<sub>0.05</sub> test.

**Table S4.** Interaction of genotype, fertilization and inoculation factors on the tillering. Treatment is in format genotype  $\times$  fertilization (0, 100, or 200 kg of potassium per ha)  $\times$  inoculation (NI – not inoculated, *S. indica* – *Serendipita indica*). Data represent means  $\pm$  SD ( $n = 6$  for *S. indica*;  $n = 9$  for NI) followed by the same letter if there was no statistical difference according to Tukey<sub>0.05</sub> test for unequal sample sizes.

| Treatment                                               | Tillers/m <sup>2</sup> (N) |
|---------------------------------------------------------|----------------------------|
| Sebastian $\times$ 0 $\times$ NI                        | 580 $\pm$ 63 abc           |
| Sebastian $\times$ 0 $\times$ <i>S. indica</i>          | 591 $\pm$ 80 abc           |
| Sebastian $\times$ 100 $\times$ NI                      | 561 $\pm$ 36 abcd          |
| Sebastian $\times$ 100 $\times$ <i>S. indica</i>        | 602 $\pm$ 77 ab            |
| Sebastian $\times$ 200 $\times$ NI                      | 586 $\pm$ 54 abc           |
| Sebastian $\times$ 200 $\times$ <i>S. indica</i>        | 535 $\pm$ 137 abcdefghi    |
| Spitfire $\times$ 0 $\times$ NI                         | 551 $\pm$ 105 abcde        |
| Spitfire $\times$ 0 $\times$ <i>S. indica</i>           | 488 $\pm$ 34 abcdefghijk   |
| Spitfire $\times$ 100 $\times$ NI                       | 477 $\pm$ 89 abcdefghijk   |
| Spitfire $\times$ 100 $\times$ <i>S. indica</i>         | 478 $\pm$ 32 abcdefghijk   |
| Spitfire $\times$ 200 $\times$ NI                       | 452 $\pm$ 73 defghijk      |
| Spitfire $\times$ 200 $\times$ <i>S. indica</i>         | 487 $\pm$ 82 abcdefghijk   |
| Accordine $\times$ 0 $\times$ NI                        | 540 $\pm$ 67 abcdefg       |
| Accordine $\times$ 0 $\times$ <i>S. indica</i>          | 475 $\pm$ 56 abcdefghijk   |
| Accordine $\times$ 100 $\times$ NI                      | 506 $\pm$ 50 abcdefghij    |
| Accordine $\times$ 100 $\times$ <i>S. indica</i>        | 499 $\pm$ 23 abcdefghij    |
| Accordine $\times$ 200 $\times$ NI                      | 510 $\pm$ 83 abcdefghij    |
| Accordine $\times$ 200 $\times$ <i>S. indica</i>        | 470 $\pm$ 101 abcdefghijk  |
| Nutans Afghanistan $\times$ 0 $\times$ NI               | 522 $\pm$ 68 abcdefghi     |
| Nutans Afghanistan $\times$ 0 $\times$ <i>S. indica</i> | 509 $\pm$ 28 abcdefghij    |
| Nutans Afghanistan $\times$ 100 $\times$ NI             | 402 $\pm$ 57 hijk          |



|                                         |                                |
|-----------------------------------------|--------------------------------|
| Nutans Afganistan×100× <i>S. indica</i> | 380 ± 77 <sup>jk</sup>         |
| Nutans Afganistan×200×NI                | 361 ± 102 <sup>k</sup>         |
| Nutans Afganistan×200× <i>S. indica</i> | 431 ± 42 <sup>defghijk</sup>   |
| CPI 18197×0×NI                          | 468 ± 83 <sup>abcdeghijk</sup> |
| CPI 18197×0× <i>S. indica</i>           | 486 ± 94 <sup>abcdeghijk</sup> |
| CPI 18197×100×NI                        | 441 ± 56 <sup>defghijk</sup>   |
| CPI 18197×100× <i>S. indica</i>         | 405 ± 39 <sup>ghijk</sup>      |
| CPI 18197×200×NI                        | 451 ± 92 <sup>defghijk</sup>   |
| CPI 18197×200× <i>S. indica</i>         | 401 ± 87 <sup>hijk</sup>       |
| CI 6388×0×NI                            | 456 ± 53 <sup>bcdeghijk</sup>  |
| CI 6388×0× <i>S. indica</i>             | 551 ± 108 <sup>abcde</sup>     |
| CI 6388×100×NI                          | 430 ± 78 <sup>fghijk</sup>     |
| CI 6388×100× <i>S. indica</i>           | 437 ± 56 <sup>defghijk</sup>   |
| CI 6388×200×NI                          | 461 ± 102 <sup>bcdeghijk</sup> |
| CI 6388×200× <i>S. indica</i>           | 416 ± 137 <sup>fghijk</sup>    |

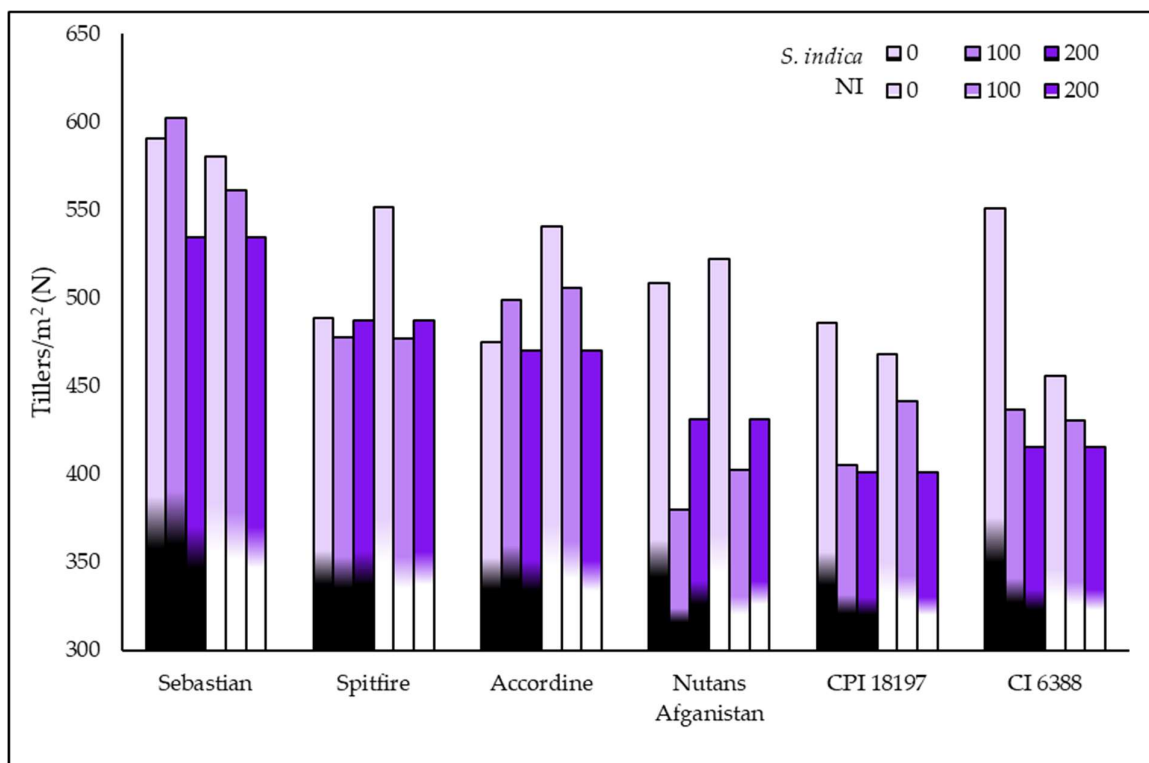

**Figure S7.** Interaction of genotype, fertilization, and inoculation factors on the tillering. Fertilization doses 0, 100, or 200 kg of potassium per ha, inoculation (NI – not inoculated, *S. indica* – *Serendipita indica*). Data represent means ( $n = 6$  for *S. indica*;  $n = 9$  for NI). Statistical significance and SD values are shown in the Supplementary Table 3.
